# Supplementary material for: Evolutionary engineering of Wickerhamomyces subpelliculosus and Kazachstania gamospora for baking
Source: Research Square preprint supplement (doi:10.21203/rs.3.rs-1020169/v1), 2021-11-03
Supplement: Supplementary file 1 [file 2cb3dde0b6d153f1b23ca3ae.docx]

Evolutionary engineering of *Wickerhamomyces subpelliculosus* and *Kazachstania gamospora* for baking

# *Thandiwe Semumu1, Amparo Gamero 2, Teun Boekhout3,4,*Nerve Zhou1

*1Department of Biological Sciences and Biotechnology, Botswana International University of Science and Technology, Private Bag 16, Central District, Palapye, Botswana*

*2Department of Preventive Medicine and Public Health, Food Science,Toxicology and Forensic Medicine, Faculty of Pharmacy, University of Valencia, Avda. Vicent Andrés Estellés S/N, 46100 Burjassot (València), Spain*

*3Westerdijk Fungal Biodiversity Institute, Utrecht, The Netherlands*

*4Institute of Biodiversity and Ecosystem Dynamics (IBED), University of Amsterdam, Amsterdam, The Netherland*

*****Corresponding Authors

[*thandiwe.semumu@studentmail.biust.ac.bw*](mailto:thandiwe.semumu@studentmail.biust.ac.bw)

[*zhoun@biust.ac.bw*](mailto:zhoun@biust.ac.bw)

Supplementary Materials

# Supplementary Data

Supplementary Table 1. Averages from syringes for fermentative capacity.

| Time (h) | *Kg_1* | *Kg_2* | *Kg_3* | *Ws_1* | *Ws_2* | *Ws_3* | Anc *Kg* | Anc *Ws* | Control |
| --- | --- | --- | --- | --- | --- | --- | --- | --- | --- |
| 0 | 0.000 | 0.000 | 0.000 | 0.000 | 0.000 | 0.000 | 0.000 | 0.000 | 0.000 |
| 2 | 5.4 ± 0.894 | 0 | 5.0 ± 0 | 5.0 ± 0 | 5.0 ± 0 | 3.0 ± 0 | 0.667 ± 0.577 | 0.333 ± 0.577 | 0.333 ± 0.577 |
| 4 | 11.4 ± 0.894 | 1.0 ± 0 | 8.6 ± 0.894 | 8.6 ± 0.894 | 11.0 ± 0 | 5.0 ± 0 | 1.0 ± 0 | 1.0 ± 0 | 0.667 ± 0.577 |
| 6 | 17.4 ± 0.894 | 1.0 ± 0 | 14.2 ± 1.095 | 18.2 ± 1.095 | 18.2 ± 1.095 | 13.8 ± 1.095 | 1.0 ± 0 | 1.0 ± 0 | 1.0 ± 0 |
| 8 | 31.4 ± 1.673 | 1.0 ± 0 | 25.8 ± 3.033 | 27.8 ± 1.095 | 33.0 ± 2.449 | 22.6 ± 0.894 | 2.333 ± 1.155 | 1.0 ± 0 | 1.667 ± 1.155 |
| 10 | 38.2 ± 2.28 | 3.0 ± 1.414 | 35.0 ± 2.828 | 34.6 ± 0.894 | 39.0 ± 1.414 | 28.6 ± 0.894 | 3.0 ± 0 | 1.667 ± 1.155 | 1.667 ± 1.155 |
| 12 | 41.4 ± 2.191 | 3.4 ± 0.894 | 41.8 ± 1.095 | 42.2 ± 1.095 | 42.6 ± 1.673 | 32.2 ± 1.095 | 3.0 ± 0 | 2.333 ± 1.155 | 3.333 ± 0.577 |
| 14 | 45.0 ± 2.828 | 3.8 ± 1.095 | 43.8 ± 1.789 | 46.2 ± 1.095 | 44.2 ± 3.033 | 37.4 ± 1.673 | 3.0 ± 0 | 2.333 ± 1.155 | 5.0 ± 0 |
| 16 | 46.2 ± 3.033 | 4.0 ± 1.414 | 45.0 ± 2.449 | 50.6 ± 0.894 | 45.8 ± 2.683 | 43.4 ± 0.894 | 3.0 ± 0 | 2.333 ± 1.155 | 5.0 ± 0 |
| 18 | 47.2 ± 3.899 | 4.8 ± 2.049 | 45.8 ± 1.789 | 54.6 ± 0.894 | 49.8 ± 1.095 | 49.0 ± 2.0 | 3.667 ± 1.155 | 2.333 ± 1.155 | 10.333 ± 1.155 |
|  |  |  |  |  |  |  |  |  |  |

**Table 2**. **Yield CO2 data**.Figure 1B was drawn from this data.

|  | OD600nm | Final volume of CO2 accumulated (mL) | Mass of cells (mg) | Yield CO2 |
| --- | --- | --- | --- | --- |
| *Kg_1* | 34.76 ± 3.790 | 47.2 ± 3.898 | 23.17333 ± 2.527 | 2.059071 ± 0.297 |
| *Kg_2* | 51.3 ± 6.849 | 4.8 ± 2.049 | 34.21333 ± 4.566 | 0.145526 ± 0.074 |
| *Kg_3* | 31.2 ± 2.619 | 45.8 ± 1.788 | 20.8 ± 1.746 | 2.210166 ± 0.139 |
| *Ws_1* | 37.92 ± 6.032 | 54.6 ± 0.894 | 25.28 ± 4.022 | 2.20942 ± 0.391 |
| *Ws_2* | 30.44 ± 1.639 | 49 ± 2 | 20.29333 ± 1.093 | 2.420023 ± 0.160 |
| *Ws_3* | 35.4 ± 3.078 | 49 ± 2 | 20.69333 ± 4.243 | 2.455269 ± 0.543 |
| Anc *Kg* | 27.4 ± 1 | 3.666667 ± 1.155 | 18.26667 ± 0.667 | 0.202258 ± 0.071 |
| Anc *Ws* | 29.06667 ± 2.444 | 2.333333 ± 1.155 | 19.37778 ± 1.629 | 0.123519 ± 0.066 |
| Control | 12.33333 ± 3.534 | 10.33333 ± 1.155 | 8.222222 ± 2.356 | 1.343258 ± 0.453 |

**Table 3. Data with weights of dough before fermentation, after fermentation and after baking**.

This was used to calculate percentage change after fermentation and after baking

|  | *Kg­_1* | Kg_2 | *Kg_3* | *Ws_1* | *Ws_2* | *Ws_3* | Anc *Kg* | Anc *Ws* | Control | NC |
| --- | --- | --- | --- | --- | --- | --- | --- | --- | --- | --- |
| Initial weight (g) | 60.59 ±3.71 | 60.68 ±3.71 | 63.61 ±3.89 | 62.89 ±3.85 | 63.45 ±3.8 | 72.41 ±4.43 | 64.29 ±3.93 | 60.52 ±3.70 | 65.23 ±3.99 | 63.21 ±3.87 |
| After fermentation (g) | 58.35 ±3.57 | 58.77 ±3.59 | 58.21 ±3.56 | 57.21 ±3.50 | 58.34 ±3.57 | 67.47 ±4.13 | 63.07 ±3.86 | 58.69 ±3.59 | 63.65 ± 3.89 | 63.21 ±3.87 |
| After baking (g) | 41.12 ±2.51 | 43.21 ±2.64 | 32.97 ±2.01 | 36.15± 2.21 | 33.29 ±2.03 | 47.89 ±2.93 | 44.49 ±2.72 | 40.30 ±2.46 | 47.52 ±2.91 | 63.21 ±3.871 |
| Percentage change after fermentation (%) | 3.69 ± 0.22 | 3.152 ± 0.19 | 8.91 ± 0.54 | 9.38 ± 0.57 | 8.42 ± 0.51 | 8.15 ± 0.49 | 2.01 ±0.12 | 3.02 ±0.18 | 2.61 ±0.15 | 0 |
| Percentage change after baking (%) | 32.13 ± 0.43 | 28.83 ± 0.30 | 50.57 ± 0.41 | 44.13 ± 0.45 | 49.77 ±0.45 | 40.47 ±0.42 | 32.68 ±0.24 | 33.37 ± 0.31 | 29.23 ±0.31 | 0 |

**Table 4. Univariate tests of significance for CO2 production**

| **Effect** | **Univariate Tests of Significance for CO2 ( mL) (fermentative capa) Sigma-restricted parameterization Effective hypothesis decomposition** | | | | |
| --- | --- | --- | --- | --- | --- |
| | SS | | --- | | | Degree of Freedom | | --- | | | MS | | --- | | | F | | --- | | | p | | --- | |
| | **Intercept** | | --- | | 56927.03 | 1 | 56927.03 | 15437.84 | 0.00 |
| | **Treatment** | | --- | | 18319.97 | 7 | 2617.14 | 709.73 | 0.00 |
| | **Error** | | --- | | 118.00 | 32 | 3.69 |  |  |

**Table 5. Univariate tests of significance for CO2 production rate**

| **Effect** | **Univariate Tests of Significance for Rate ( mL/h) (fermentative capacity) Sigma-restricted parameterization Effective hypothesis decomposition** | | | | |
| --- | --- | --- | --- | --- | --- |
| | SS | | --- | | | Degree of Freedom | | --- | | | MS | | --- | | | F | | --- | | | p | | --- | |
| | **Intercept** | | --- | | 1.209471 | 1 | 1.209471 | 8201.649 | 0.000000 |
| | **Treatment** | | --- | | 0.206210 | 7 | 0.029459 | 199.764 | 0.000000 |
| | **Error** | | --- | | 0.002359 | 16 | 0.000147 |  |  |

**Table 6. Univariate tests of significance for CO2 yield**

| **Effect** | **Univariate Tests of Significance for CO2 ( mL) (fermentative capacity) Sigma-restricted parameterization Effective hypothesis decomposition** | | | | |
| --- | --- | --- | --- | --- | --- |
| | SS | | --- | | | Degree of Freedom | | --- | | | MS | | --- | | | F | | --- | | | p | | --- | |
| | **Intercept** | | --- | | 105.7074 | 1 | 105.7074 | 1221.880 | 0.000000 |
| | **Treatment** | | --- | | 32.7827 | 7 | 4.6832 | 54.134 | 0.000000 |
| | **Error** | | --- | | 2.7684 | 32 | 0.0865 |  |  |

**Table 7. Univariate tests of significance for bread heights**

| **Effect** | **Univariate Tests of Significance for Height (Bread heights ) Sigma-restricted parameterization Effective hypothesis decomposition** | | | | |
| --- | --- | --- | --- | --- | --- |
| | SS | | --- | | | Degr. of Freedom | | --- | | | MS | | --- | | | F | | --- | | | p | | --- | |
| | **Intercept** | | --- | | 995.3280 | 1 | 995.3280 | 7511.343 | 0.000000 |
| | **Treatment** | | --- | | 64.7520 | 9 | 7.1947 | 54.295 | 0.000000 |
| | **Error** | | --- | | 2.6502 | 20 | 0.1325 |  |  |

**Table 8. Post-hoc Tukey HSD for CO2 production**

| Tukey HSD test; variable CO2 (mL) (fermentative capa). Approximate probabilities for Post Hoc Tests Error: Between MS = 3.6875, df = 32.000 | | | | | | | | |
| --- | --- | --- | --- | --- | --- | --- | --- | --- |
| | Treatment | | --- | | | {*Kg_1*} 52.200 | | --- | | | {*Kg_3*} 50.800 | | --- | | | (*Ws*_1) 8.6000 | | --- | | | {*Ws_2*} 59.600 | | --- | | | {*Ws_3}* 54.000 | | --- | | | {*Anc Kg*} 54.000 | | --- | | | {Anc *Ws*} 7.4000 | | --- | | | {Control} 15.200 | | --- | |
| *Kg_1* |  | 0.939348 | 0.000138 | 0.000152 | 0.811025 | 0.811025 | 0.000138 | 0.000138 |
| *Kg_3* | 0.939348 |  | 0.000138 | 0.000138 | 0.180786 | 0.180786 | 0.000138 | 0.000138 |
| Anc *Kg* | 0.000138 | 0.000138 |  | 0.000138 | 0.000138 | 0.000138 | 0.972981 | 0.000257 |
| *Ws_1* | 0.000152 | 0.000138 | 0.000138 |  | 0.001528 | 0.001528 | 0.000138 | 0.000138 |
| *Ws_2* | 0.811025 | 0.180786 | 0.000138 | 0.001528 |  | 1.000000 | 0.000138 | 0.000138 |
| *Ws_3* | 0.811025 | 0.180786 | 0.000138 | 0.001528 | 1.000000 |  | 0.000138 | 0.000138 |
| Anc *Ws* | 0.000138 | 0.000138 | 0.972981 | 0.000138 | 0.000138 | 0.000138 |  | 0.000143 |
| Control | 0.000138 | 0.000138 | 0.000257 | 0.000138 | 0.000138 | 0.000138 | 0.000143 |  |

**Table 9. Post-hoc Tukey HSD data for CO2 production rate**

| Tukey HSD test; variable Rate ( mL/h) (fermentative capacity) Approximate Probabilities for Post Hoc Tests Error: Between MS = 0.00015, df = 16.000 | | | | | | | | |
| --- | --- | --- | --- | --- | --- | --- | --- | --- |
| | Treatment | | --- | | | {*Kg_1*} 0.25330 | | --- | | | {*Kg_3*} 0.22550 | | --- | | | {*Ws_1*} 0.06280 | | --- | | | {*Ws_2*} 0.29330 | | --- | | | {*Ws_3*} 0.27470 | | --- | | | {Anc *Kg*} 0.37710 | | --- | | | {Anc *Ws}* 0.12770 | | --- | | | {Control} 0.18150 | | --- | |
| *Kg_1* |  | 0.161845 | 0.000175 | 0.016829 | 0.422353 | 0.000175 | 0.000175 | 0.000202 |
| *Kg_3* | 0.161845 |  | 0.000175 | 0.000243 | 0.002868 | 0.000175 | 0.000175 | 0.007715 |
| Anc *Kg* | 0.000175 | 0.000175 |  | 0.000175 | 0.000175 | 0.000175 | 0.000299 | 0.000175 |
| *Ws_1* | 0.016829 | 0.000243 | 0.000175 |  | 0.583724 | 0.000177 | 0.000175 | 0.000175 |
| *Ws_2* | 0.422353 | 0.002868 | 0.000175 | 0.583724 |  | 0.000175 | 0.000175 | 0.000175 |
| *Ws_3* | 0.000175 | 0.000175 | 0.000175 | 0.000177 | 0.000175 |  | 0.000175 | 0.000175 |
| Anc *Ws* | 0.000175 | 0.000175 | 0.000299 | 0.000175 | 0.000175 | 0.000175 |  | 0.001249 |
| Control | 0.000202 | 0.007715 | 0.000175 | 0.000175 | 0.000175 | 0.000175 | 0.001249 |  |

**Table 10. Post-hoc Tukey HSD data for CO2 yield**

| Tukey HSD test; variable CO2 ( mL) (fermentative capacity) Approximate Probabilities for Post Hoc Tests Error: Between MS = 0.08651, df = 32.000 | | | | | | | | |
| --- | --- | --- | --- | --- | --- | --- | --- | --- |
| | Treatment | | --- | | | {*Kg_1*} 2.0591 | | --- | | | {*Kg_3*} 2.2102 | | --- | | | {Ws_1} 0.20479 | | --- | | | {*Ws_2*} 2.2094 | | --- | | | {*Ws_3*} 2.4200 | | --- | | | {Anc *Kg*} 2.4553 | | --- | | | {Anc *Ws*} 0.12352 | | --- | | | {Control} 1.3228 | | --- | |
| *Kg_1* |  | 0.991198 | 0.000138 | 0.991453 | 0.535144 | 0.418688 | 0.000138 | 0.008425 |
| *Kg_3* | 0.991198 |  | 0.000138 | 1.000000 | 0.945596 | 0.885461 | 0.000138 | 0.001019 |
| Anc *Kg* | 0.000138 | 0.000138 |  | 0.000138 | 0.000138 | 0.000138 | 0.999837 | 0.000157 |
| *Ws_1* | 0.991453 | 1.000000 | 0.000138 |  | 0.944610 | 0.883886 | 0.000138 | 0.001029 |
| *Ws_2* | 0.535144 | 0.945596 | 0.000138 | 0.944610 |  | 0.999999 | 0.000138 | 0.000165 |
| *Ws_3* | 0.418688 | 0.885461 | 0.000138 | 0.883886 | 0.999999 |  | 0.000138 | 0.000153 |
| Anc *Ws* | 0.000138 | 0.000138 | 0.999837 | 0.000138 | 0.000138 | 0.000138 |  | 0.000142 |
| Control | 0.008425 | 0.001019 | 0.000157 | 0.001029 | 0.000165 | 0.000153 | 0.000142 |  |

**Table 11. Post-hoc Tukey HSD data for bread heights**

| Tukey HSD test; variable Height (Bread heights ) Approximate Probabilities for Post Hoc Tests Error: Between MS = .13251, df = 20.000 | | | | | | | | | | |
| --- | --- | --- | --- | --- | --- | --- | --- | --- | --- | --- |
| | Treatment | | --- | | | {NC} 3.1000 | | --- | | | {Control} 5.1000 | | --- | | | {Anc *Kg*} 3.9000 | | --- | | | {*Kg_1*} 7.0000 | | --- | | | {*Kg_2*} 4.9000 | | --- | | | {*Kg_3*} 6.7000 | | --- | | | {Anc *Ws*} 5.1000 | | --- | | | {*Ws_1*} 7.5000 | | --- | | | {*Ws_2*} 7.4000 | | --- | | | {*Ws_3*} 6.9000 | | --- | |
| NC |  | 0.000221 | 0.241332 | 0.000179 | 0.000368 | 0.000179 | 0.000221 | 0.000179 | 0.000179 | 0.000179 |
| Control | 0.000221 |  | 0.017820 | 0.000267 | 0.999421 | 0.001066 | 1.000000 | 0.000187 | 0.000188 | 0.000368 |
| Anc *Kg* | 0.241332 | 0.017820 |  | 0.000179 | 0.071238 | 0.000179 | 0.017820 | 0.000179 | 0.000179 | 0.000179 |
| *Kg_1* | 0.000179 | 0.000267 | 0.000179 |  | 0.000201 | 0.988145 | 0.000267 | 0.792711 | 0.930034 | 0.999998 |
| *Kg_2* | 0.000368 | 0.999421 | 0.071238 | 0.000201 |  | 0.000368 | 0.999421 | 0.000179 | 0.000186 | 0.000221 |
| *Kg_3* | 0.000179 | 0.001066 | 0.000179 | 0.988145 | 0.000368 |  | 0.001066 | 0.241332 | 0.399098 | 0.999421 |
| Anc *Ws* | 0.000221 | 1.000000 | 0.017820 | 0.000267 | 0.999421 | 0.001066 |  | 0.000187 | 0.000188 | 0.000368 |
| *Ws_1* | 0.000179 | 0.000187 | 0.000179 | 0.792711 | 0.000179 | 0.241332 | 0.000187 |  | 0.999998 | 0.597037 |
| *Ws_2* | 0.000179 | 0.000188 | 0.000179 | 0.930034 | 0.000186 | 0.399098 | 0.000188 | 0.999998 |  | 0.792711 |
| *Ws_3* | 0.000179 | 0.000368 | 0.000179 | 0.999998 | 0.000221 | 0.999421 | 0.000368 | 0.597037 | 0.792711 |  |

# Supplementary Figures

**
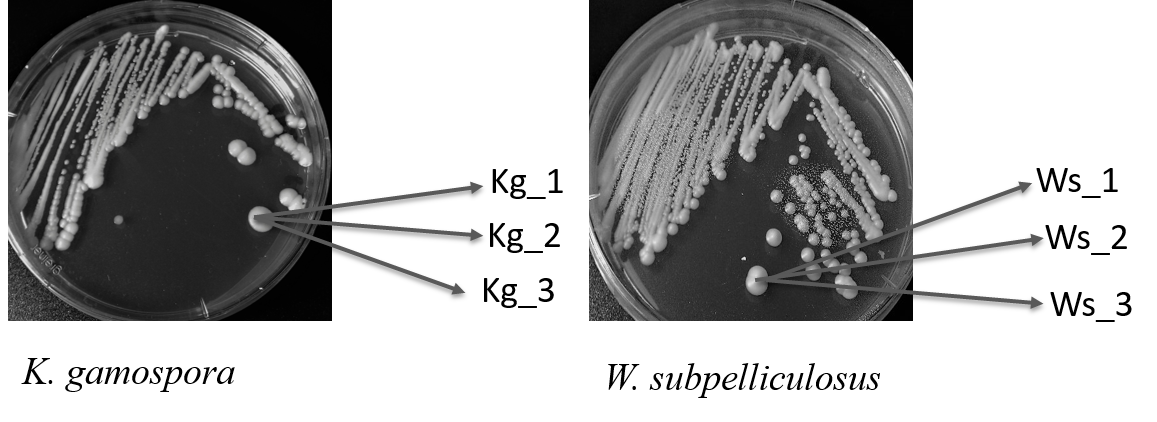
**

**Supplementary Figure 1**. Graphic view of the designation of strain identities. A single colony from *K. gamospora* plate was picked and used to inoculate into three parallel replicate Eppendorf tubes containing flour dough and designated as *Kg_1, Kg_2*, and *Kg_3*. Similarly replicates of colony from *W. subpelliculosus* plates were designated as *Ws_1, Ws_2*, and *Ws_3*.

**
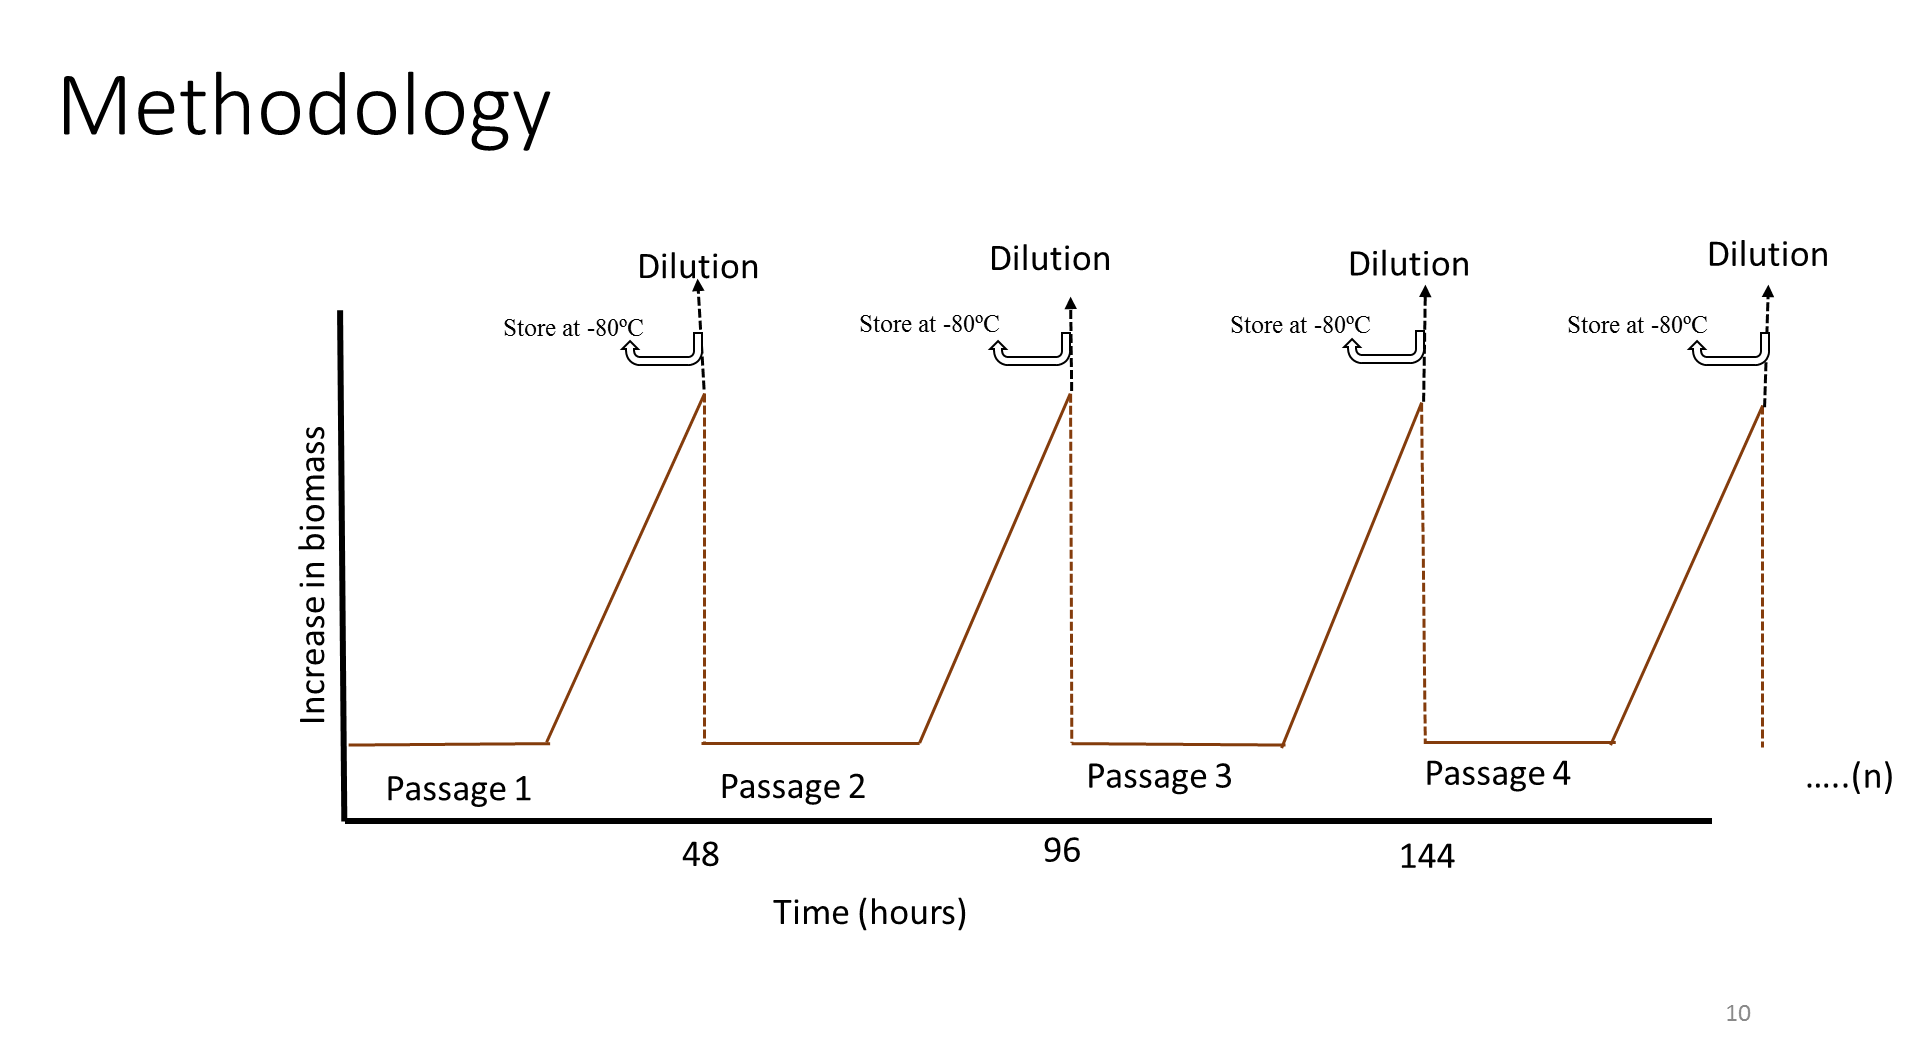
**

Supplementary Figure 2. Evolutionary engineering scheme used to evolve yeasts.

A single colony of cells was inoculated into flour and allowed to grow for 48 hours (Passage 1). After 48 hours of incubation, a pipette tip full of flour was used to inoculate a new tube with fresh and sterile flour, represented as Dilution. The remaining fermented flour was stored at ˗80 ºC. The red line shows the increment in yeast cell biomass (not investigated in this thesis). This procedure was repeated for 60 passages were serially diluted into a new tube and the previous tube was cryopreserved for future reference.
